# Supplementary material
Source: publisher site journal article supplement (https://static.cambridge.org/content/id/urn:cambridge.org:id:article:S0145553220000097/resource/name/S0145553220000097supp001.docx)
Supplement: Supplementary file 1 [file S0145553220000097supp001.docx]

Appendix Tables

| **Table A1. Inequality ratios 1983, 1991, 2000, 2006 and 2010**  **according to gender.** | | | | | | |
| --- | --- | --- | --- | --- | --- | --- |
|  | **Man** | | | **Woman** | | |
| **Year** | **P99/P10** | **P99/P50** | **P50/P10** | **P99/P10** | **P99/P50** | **P50/P10** |
| **1983** | 4.4 | 2.5 | 1.8 | 4.1 | 2.2 | 1.9 |
| **1990** | 5.7 | 3.0 | 1.9 | 5.0 | 2.5 | 2.0 |
| **2000** | 7.6 | 4.1 | 1.9 | 5.7 | 2.9 | 2.0 |
| **2006** | 8.7 | 4.2 | 2.1 | 6.0 | 3.1 | 1.9 |
| **2010** | 10.2 | 4.2 | 2.4 | 7.2 | 3.3 | 2.2 |

Source: Author’s own calculations from SCB data.

| **Table A2.Inequality ratios 1983 and 2010 according to age and gender.** | | | | | | |
| --- | --- | --- | --- | --- | --- | --- |
|  | **1983** | | | | | |
|  | **Man** | | | **Woman** | | |
| **Age** | **P99/P10** | **P99/P50** | **P50/P10** | **P99/P10** | **P99/P50** | **P50/P10** |
| **20** | 5.3 | 2.0 | 2.56 | 3.3 | 1.6 | 2.1 |
| **30** | 3.1 | 1.9 | 1.6 | 4.1 | 1.9 | 2.1 |
| **40** | 4.0 | 2.4 | 1.6 | 4.5 | 2.1 | 2.2 |
| **50** | 4.1 | 2.6 | 1.6 | 4.5 | 2.0 | 2.2 |
| **60** | 3.8 | 2.4 | 1.6 | 7.0 | 2.1 | 3.3 |
| **70** | 3.3 | 2.4 | 1.4 | 3.0 | 2.6 | 1.4 |
| **80** | 2.9 | 2.4 | 1.2 | 2.4 | 1.8 | 1.4 |
|  | **2010** | | | | | |
|  | **Man** | | | **Woman** | | |
| **Age** | **P99/P10** | **P99/P50** | **P50/P10** | **P99/P10** | **P99/P50** | **P50/P10** |
| **20** | 12.8 | 3.1 | 4.1 | 9.4 | 2.5 | 3.7 |
| **30** | 6.8 | 2.4 | 2.8 | 5.7 | 2.4 | 2.4 |
| **40** | 8.4 | 3.6 | 2.3 | 5.4 | 2.7 | 2.0 |
| **50** | 10.4 | 4.5 | 2.3 | 6.2 | 3.2 | 1.9 |
| **60** | 10.8 | 4.9 | 2.2 | 6.9 | 3.5 | 2.0 |
| **70** | 8.4 | 5.8 | 1.4 | 6.7 | 4.5 | 1.5 |
| **80** | 7.3 | 5.4 | 1.3 | 6.1 | 3.9 | 1.6 |

Source: Author’s own calculations from SCB data.
